# Supplementary material for: Smart triage: Development of a rapid pediatric triage algorithm for use in low-and-middle income countries
Source: PubMed Central journal article supplement (PMC9723221; doi:10.3389/fped.2022.976870), 2022-11-22
Supplement: Table2.pdf [file Table2.pdf]

**Supplementary Table S2: Candidate predictor variables, definitions, and response values (N=63).**

| Variable                           | Standardized Prompt                                                                                  | Response Values                                                                                    |
|------------------------------------|------------------------------------------------------------------------------------------------------|----------------------------------------------------------------------------------------------------|
| <b>Patient Information</b>         |                                                                                                      |                                                                                                    |
| Age                                | Enter age at admission in months.                                                                    | Integer (months)                                                                                   |
| Sex                                | Enter biological sex.                                                                                | Female / Male                                                                                      |
| Length of Illness                  | Ask: How many days has the child been sick in this illness?                                          | Integer (days)                                                                                     |
| Urgent referral                    | Ask: Was the child referred to this hospital from another health facility in the last 24 hours?      | No / Yes                                                                                           |
| Previous admissions                | Ask: Has the child been admitted to a hospital or health center in the last 6 months?                | No / Yes                                                                                           |
| Number of previous admissions      | Ask: How many times was the child admitted to the hospital or health centre in the last 6 months?    | Number                                                                                             |
| Time since last hospitalization    | Ask: How long ago was the child last admitted to a hospital or health center?                        | < 7 days / 7-14 days / 14-30 days / 1 month / 2 months / 3 months / 4 months / 5 months / 6 months |
| <b>Vital Signs</b>                 |                                                                                                      |                                                                                                    |
| Oxygen saturation                  | Measure peripheral oxygen saturation using the mobile pulse oximeter (See SOP).                      | Continuous (%)                                                                                     |
| Heart Rate                         | Record the patient's heart rate from previous pulse oximetry measurement (See SOP).                  | Continuous (bpm)                                                                                   |
| Respiratory Rate                   | Measure respiratory rate using the app provided (See SOP).                                           | Continuous (breaths per minute)                                                                    |
| Temperature                        | Measure and record axillary temperature (See SOP).                                                   | Continuous (degrees Celsius)                                                                       |
| <b>Anthropometric Measurements</b> |                                                                                                      |                                                                                                    |
| Weight                             | Measure and record the child's weight. (See SOP)                                                     | Continuous (kg)                                                                                    |
| Height                             | Measure and record the child's height. Measure length instead if younger than 2 years old (See SOP). | Continuous (cm)                                                                                    |
| Middle upper arm circumference     | Measure and record the child's mid-upper arm circumference (See SOP).                                | Continuous (mm)                                                                                    |
| <b>Clinical Signs and Symptoms</b> |                                                                                                      |                                                                                                    |
| <b>Respiratory</b>                 |                                                                                                      |                                                                                                    |
| Difficulty breathing               | Is the child having difficulty breathing compared to a well child?                                   | No / Yes                                                                                           |
| Stridor                            | Does the child have stridor? (High pitched sound from upper airway during inspiration)               | No / Yes                                                                                           |
| Indrawing                          | Does the child have chest indrawing on inspiration? ("Drawing in" of lower chest during inspiration) | No / Yes                                                                                           |

|                                                |                                                                                                                                                               |          |
|------------------------------------------------|---------------------------------------------------------------------------------------------------------------------------------------------------------------|----------|
| Flaring                                        | Does the child have nasal flaring during inspiration?<br>(Widening of nostrils during inspiration)                                                            | No / Yes |
| Grunting                                       | Does the child have a grunt on expiration? (Short noise at each expiration)                                                                                   | No / Yes |
| Tracheal tug                                   | Does the child have a tracheal tug on inspiration?<br>(Downward movement of trachea during inspiration)                                                       | No / Yes |
| Accessory muscle use                           | Does the child use accessory muscles when breathing? (e.g., neck, chest, abdominal, or upper back muscles)                                                    | No / Yes |
| Wheezing                                       | Does the child have a wheeze during expiration when listening with a stethoscope? (High pitched sound in chest during expiration)                             | No / Yes |
| Cough                                          | Record if you have observed coughing from the child.                                                                                                          | No / Yes |
| Central cyanosis                               | Are the child's lips or tongue a blue or dark blue color?                                                                                                     | No / Yes |
| <b>Circulation</b>                             |                                                                                                                                                               |          |
| Supplemental oxygen                            | Is the child receiving supplemental oxygen?                                                                                                                   | No / Yes |
| Capillary refill time > 3 seconds (upper limb) | Apply pressure to a thumb or finger for 3 seconds to blanch it. Does it take more than 3 seconds to return to original pink color after you let go? (See SOP) | No / Yes |
| Cool peripheries                               | Are the child's hands cold?                                                                                                                                   | No / Yes |
| Weak or absent radial pulse                    | Does the child's radial pulse feel weak or absent?                                                                                                            | No / Yes |
| Pallor                                         | Is the child pale at their palms, oral mucosa, or conjunctiva compared to their caretaker?                                                                    | No / Yes |
| <b>Dehydration</b>                             |                                                                                                                                                               |          |
| Skin pinch                                     | Pinch the child's skin in the lower arm until it is tented, then release it. Does it take longer than 2 seconds to return to baseline?                        | No / Yes |
| Sunken eyes                                    | Does the child's eyes appear to sink into their sockets?                                                                                                      | No / Yes |
| No tears while crying                          | Ask: Has the child stopped making tears when he/she is crying?"                                                                                               | No / Yes |
| Dry oral mucosa                                | Does the child's oral mucosa (not lips) appear dried out?                                                                                                     | No / Yes |
| <b>Gastrointestinal/Genitourinary</b>          |                                                                                                                                                               |          |
| Vomiting                                       | Ask: Does the child throw up everything they eat or drink?                                                                                                    | No / Yes |
| Diarrhoea                                      | Ask: Has the child had diarrhoea 3 or times per day since getting sick?                                                                                       | No / Yes |
| Chronic diarrhea                               | Ask: Did the child have diarrhea for more than two weeks?                                                                                                     | No / Yes |
| Dysentery                                      | Ask: Has the child had blood in their stools?                                                                                                                 | No / Yes |
| <b>Neurologic</b>                              |                                                                                                                                                               |          |

|                                     |                                                                                                                                                                                   |                                                                         |
|-------------------------------------|-----------------------------------------------------------------------------------------------------------------------------------------------------------------------------------|-------------------------------------------------------------------------|
| AVPU                                | Assess and select consciousness level using the AVPU scale (See SOP).                                                                                                             | Alert / Responds to voice / Responds to pain / Unresponsive             |
| Convulsions (reported, history of)  | Ask: Has the child had convulsions before? (See SOP).                                                                                                                             | No / Yes                                                                |
| Convulsions (actively, now)         | Was the child actively convulsing during this assessment?                                                                                                                         | No / Yes                                                                |
| Irritable                           | Has the child been crying uncontrollably throughout the interview, even before you approached them?                                                                               | No / Yes                                                                |
| Inability to drink or breastfeed    | Ask: Has the child been too sleepy or tired to breastfeed, drink, or eat for more than 6 hours?                                                                                   | No / Yes                                                                |
| <b>Malnutrition</b>                 |                                                                                                                                                                                   |                                                                         |
| Oedema                              | Does the child have pitting oedema on their feet, knees, or face?                                                                                                                 | No / Yes                                                                |
| Severe wasting                      | Does the child seem wasted?                                                                                                                                                       | No / Yes                                                                |
| <b>Infection</b>                    |                                                                                                                                                                                   |                                                                         |
| History of fever                    | Ask: Does the child have a history of fever?                                                                                                                                      | No / Yes                                                                |
| Rash                                | Does the child have a rash?                                                                                                                                                       | No / Yes                                                                |
| Infective lesion                    | Does the child have an infective lesion on the skin, eye or ear?                                                                                                                  | No / Yes                                                                |
| <b>Trauma</b>                       |                                                                                                                                                                                   |                                                                         |
| Major trauma                        | Has the child suffered trauma needing a designated trauma team or urgent surgery? OR Does he/she have a penetrating injury, pelvic or long bone fracture, or head or neck injury? | No / Yes                                                                |
| Burns                               | Has the child suffered a burn resulting in skin breakdown?                                                                                                                        | No / Yes                                                                |
| Poisoning                           | Has the child ingested a chemical or drug not intended for ingestion by the child?                                                                                                | No / Yes                                                                |
| Severe pain                         | Does the child seem to be in severe pain?                                                                                                                                         | No / Yes                                                                |
| <b>Other</b>                        |                                                                                                                                                                                   |                                                                         |
| Parent concern                      | Ask: Do you think that this child may need admission because he is sicker than he has been in the past?                                                                           | No / Yes                                                                |
| <b>Sociodemographic Information</b> |                                                                                                                                                                                   |                                                                         |
| Child HIV status                    | Record HIV status if records available. Otherwise ask: Has your child tested positive for HIV?                                                                                    | No / Yes                                                                |
| Maternal HIV status                 | Record HIV status if records available. Otherwise ask: Has the child's mother tested positive for HIV?                                                                            | No / Yes                                                                |
| Primary caregiver                   | Ask: Who is the primary caregiver of the child?                                                                                                                                   | Mother / Father / Grandparent / Other relative / Non-relative / Daycare |

|                           |                                                                                           |                                                                                                                  |
|---------------------------|-------------------------------------------------------------------------------------------|------------------------------------------------------------------------------------------------------------------|
| Mother alive              | Ask: Is the child's mother still alive?                                                   | No / Yes                                                                                                         |
| Maternal education        | Ask: What is the highest level of school reached by the child's mother? Read out options. | No school / Primary / Secondary / Post-secondary / Don't know                                                    |
| Maternal age              | Ask: How old is the child's mother?                                                       | Integer (years)                                                                                                  |
| Boil all drinking water   | Ask: Do you always boil water before the child drinks it?                                 | No / Yes                                                                                                         |
| Water source              | Ask: Where does the child get most of his/her drinking water from? Read out options.      | Bottled / Tap / Borehole / Protected spring / Open source / Slow running water / Fast running water / Don't know |
| <b>Laboratory Testing</b> |                                                                                           |                                                                                                                  |
| HIV                       | Enter HIV test result.                                                                    | Negative / Positive / Not done                                                                                   |
| Malaria                   | Enter Malaria test result.                                                                | Negative / Positive / Not done                                                                                   |
