# Supplementary material for: Smart triage: Development of a rapid pediatric triage algorithm for use in low-and-middle income countries
Source: PubMed Central journal article supplement (PMC9723221; doi:10.3389/fped.2022.976870), 2022-11-22
Supplement: Table3.pdf [file Table3.pdf]

**Supplementary Table S3: Summary of predictor variables stratified across participants with and without a positive admission outcome.**

| Factor variables                               | Missing | Events among participants with an admission outcome (N) | Events among participants with no admission outcome (N) | Total events (N) | Event admission rate (%) | Odds ratio (95% CI) | p-value |
|------------------------------------------------|---------|---------------------------------------------------------|---------------------------------------------------------|------------------|--------------------------|---------------------|---------|
| <b>Patient Information</b>                     |         |                                                         |                                                         |                  |                          |                     |         |
| Male sex                                       | 3       | 204                                                     | 625                                                     | 829              | 0.246                    | 1.26 (1.00, 1.59)   | 0.055   |
| Previous admissions                            | 4       | 98                                                      | 194                                                     | 292              | 0.336                    | 2.00 (1.51, 2.64)   | <0.0001 |
| Urgent referral                                | 5       | 60                                                      | 37                                                      | 97               | 0.619                    | 6.46 (4.23, 9.99)   | <0.0001 |
| <b>Clinical Signs and Symptoms</b>             |         |                                                         |                                                         |                  |                          |                     |         |
| <b>Respiratory</b>                             |         |                                                         |                                                         |                  |                          |                     |         |
| Difficulty breathing                           | 4       | 154                                                     | 206                                                     | 360              | 0.428                    | 3.71 (2.87, 4.79)   | <0.0001 |
| Stridor                                        | 5       | 6                                                       | 11                                                      | 17               | 0.353                    | 1.45 (0.59, 3.84)   | 0.469   |
| Indrawing                                      | 5       | 48                                                      | 36                                                      | 84               | 0.571                    | 4.00 (2.33, 6.35)   | <0.0001 |
| Flaring                                        | 5       | 40                                                      | 24                                                      | 64               | 0.625                    | 4.93 (2.94, 8.44)   | <0.0001 |
| Grunting                                       | 5       | 13                                                      | 8                                                       | 21               | 0.619                    | 4.44 (1.85, 11.32)  | 0.001   |
| Tracheal tug                                   | 5       | 12                                                      | 10                                                      | 22               | 0.545                    | 3.26 (1.39, 7.80)   | 0.006   |
| Accessory muscle use                           | 5       | 44                                                      | 26                                                      | 70               | 0.629                    | 5.07 (3.08, 8.50)   | <0.0001 |
| Wheezing                                       | 5       | 25                                                      | 36                                                      | 61               | 0.410                    | 1.91 (1.11, 3.23)   | 0.0165  |
| Cough                                          | 5       | 130                                                     | 313                                                     | 443              | 0.293                    | 1.17 (0.89, 1.53)   | 0.251   |
| Central cyanosis                               | 4       | 5                                                       | 2                                                       | 7                | 0.714                    | NA                  | <0.0001 |
| <b>Circulation</b>                             |         |                                                         |                                                         |                  |                          |                     |         |
| Supplemental oxygen                            | 3       | 9                                                       | 1                                                       | 10               | 0.900                    | NA                  | 0.001   |
| Capillary refill time > 3 seconds (upper limb) | 4       | 50                                                      | 18                                                      | 68               | 0.735                    | 10.88 (6.38, 19.40) | <0.0001 |
| Cool peripheries                               | 0       | 39                                                      | 10                                                      | 49               | 0.796                    | 2.84 (0.89, 9.05)   | 0.074   |
| Weak or absent radial pulse                    | 4       | 0                                                       | 1                                                       | 1                | 0.000                    | NA                  | 0.972   |
| Pallor                                         | 8       | 83                                                      | 39                                                      | 122              | 0.680                    | 9.15 (6.17, 13.81)  | <0.0001 |

| <b>Dehydration</b>                        |   |     |      |      |       |                    |         |
|-------------------------------------------|---|-----|------|------|-------|--------------------|---------|
| Skin pinch                                | 4 | 18  | 191  | 209  | 0.086 | 1.98 (0.98, 3.88)  | 0.049   |
| Sunken eyes                               | 4 | 38  | 44   | 82   | 0.463 | 2.84 (1.80, 4.46)  | <0.0001 |
| No tears while crying                     | 4 | 11  | 20   | 31   | 0.355 | 1.70 (0.78, 3.53)  | 0.162   |
| Dry oral mucosa                           | 4 | 29  | 26   | 55   | 0.527 | 0.31 (0.18, 0.49)  | <0.0001 |
| <b>Gastrointestinal/Genitourinary</b>     |   |     |      |      |       |                    |         |
| Vomiting                                  | 4 | 103 | 159  | 262  | 0.393 | 2.70 (2.03, 3.58)  | <0.0001 |
| Diarrhoea                                 | 4 | 90  | 248  | 338  | 0.266 | 1.32 (1.00, 1.74)  | 0.0458  |
| Chronic diarrhoea                         | 4 | 10  | 20   | 30   | 0.333 | 1.43 (0.62, 3.11)  | 0.386   |
| Dysentery                                 | 4 | 10  | 21   | 31   | 0.323 | 1.35 (0.59, 2.93)  | 0.458   |
| <b>Neurologic</b>                         |   |     |      |      |       |                    |         |
| <b>AVPU:</b>                              | 4 |     |      |      |       |                    |         |
| 1. <i>alert</i>                           |   | 355 | 1242 | 1597 | 0.222 | 0.17 (0.05, 0.54)  | 0.003   |
| 2. <i>responds to voice</i>               |   | 3   | 0    | 3    | 1.000 | NA                 | NA      |
| 3. <i>responds to pain</i>                |   | 5   | 3    | 8    | 0.625 | NA                 | NA      |
| 4. <i>unresponsive</i>                    |   | 0   | 0    | 0    | 0.000 | NA                 | NA      |
| Convulsions (reported, history of)        | 4 | 5   | 1    | 6    | 0.833 | NA                 | 0.155   |
| Convulsions during assessment, (observed) | 4 | 1   | 2    | 3    | 0.333 | NA                 | 0.273   |
| Irritable                                 | 8 | 42  | 73   | 115  | 0.365 | 2.09 (1.40, 3.11)  | <0.0001 |
| Inability to drink or breastfeed          | 9 | 97  | 91   | 188  | 0.516 | 4.62 (3.37, 6.34)  | <0.0001 |
| <b>Malnutrition</b>                       |   |     |      |      |       |                    |         |
| Oedema                                    | 8 | 19  | 11   | 30   | 0.633 | 6.19 (2.97, 10.58) | <0.0001 |
| Severe wasting                            | 0 | 19  | 23   | 42   | 0.452 | 2.82 (1.21, 6.27)  | 0.0126  |
| <b>Infection</b>                          |   |     |      |      |       |                    |         |
| History of fever                          | 8 | 321 | 899  | 1220 | 0.260 | 3.08 (2.19, 4.44)  | <0.0001 |
| Rash                                      | 8 | 50  | 273  | 323  | 0.150 | 0.56 (0.41, 0.78)  | <0.001  |
| Infective lesion                          | 8 | 10  | 70   | 80   | 0.130 | 0.48 (0.23, 0.89)  | 0.0304  |
| <b>Trauma</b>                             |   |     |      |      |       |                    |         |

|                                           |   |     |      |      |       |                    |         |
|-------------------------------------------|---|-----|------|------|-------|--------------------|---------|
| Major trauma                              | 8 | 0   | 3    | 3    | 0.000 | NA                 | NA      |
| Burns                                     | 8 | 2   | 15   | 17   | 0.118 | 0.45 (0.07, 1.62)  | 0.296   |
| Poisoning                                 | 8 | 4   | 7    | 11   | 0.364 | 1.96 (0.51, 6.56)  | 0.282   |
| Severe pain                               | 8 | 110 | 72   | 182  | 0.604 | 7.07 (5.12, 9.84)  | <0.0001 |
| <b>Other</b>                              |   |     |      |      |       |                    |         |
| Parent concern                            | 4 | 93  | 42   | 135  | 0.69  | 9.85 (6.73, 14.64) | <0.0001 |
| <b>Sociodemographic Information</b>       |   |     |      |      |       |                    |         |
| Child HIV status                          | 4 | 144 | 441  | 585  | 0.246 | 0.92 (0.23, 0.32)  | 0.142   |
| Maternal HIV status                       | 4 | 11  | 42   | 53   | 0.208 | 0.93 (0.45, 1.76)  | 0.828   |
| <b>Primary caregiver:</b>                 | 4 |     |      |      |       |                    |         |
| 1. <i>mother</i>                          |   | 333 | 1186 | 1519 | 0.219 | 0.28 (0.25, 0.32)  | 0.012   |
| 2. <i>father</i>                          |   | 9   | 10   | 19   | 0.474 | 2.19 (1.27, 8.04)  | 0.008   |
| 3. <i>grandparent</i>                     |   | 19  | 31   | 50   | 0.380 | 0.67 (0.16, 2.03)  | 0.527   |
| 4. <i>other relative</i>                  |   | 3   | 16   | 19   | 0.158 | NA                 | NA      |
| 5. <i>non-relative</i>                    |   | 0   | 1    | 1    | 0.000 | NA                 | NA      |
| Mother alive                              | 4 | 5   | 5    | 10   | 0.500 | 0.29 (0.08, 1.04)  | 0.051   |
| <b>Maternal education:</b>                | 4 |     |      |      |       |                    |         |
| 1. <i>no school</i>                       |   | 16  | 44   | 60   | 0.267 | 1.15 (0.64, 2.15)  | 0.655   |
| 2. <i>primary</i>                         |   | 151 | 362  | 513  | 0.294 | 0.75 (0.42, 1.40)  | 0.34    |
| 3. <i>secondary</i>                       |   | 170 | 621  | 791  | 0.215 | 0.31 (0.15, 0.64)  | 0.001   |
| 4. <i>post-Secondary</i>                  |   | 24  | 212  | 236  | 0.102 | 0.39 (0.07, 2.34)  | 0.524   |
| Boil all drinking water                   | 4 | 199 | 885  | 1084 | 0.184 | 0.49 (0.38, 0.62)  | <0.0001 |
| <b>Primary water source for drinking:</b> | 4 |     |      |      |       |                    |         |
| 1. <i>bottled</i>                         |   | 1   | 4    | 5    | 0.200 | NA                 | NA      |
| 2. <i>municipal/tap</i>                   |   | 223 | 1023 | 1246 | 0.179 | 1.13 (0.59, 7.70)  | 0.900   |
| 3. <i>bore hole</i>                       |   | 103 | 143  | 246  | 0.419 | 0.29 (0.06, 2.02)  | 0.347   |
| 4. <i>protected spring</i>                |   | 30  | 62   | 92   | 0.326 | 0.44 (0.02, 3.14)  | 0.562   |
| 5. <i>open source</i>                     |   | 3   | 3    | 6    | 0.500 | NA                 | NA      |
| 6. <i>slow running water</i>              |   | 1   | 2    | 3    | 0.333 | NA                 | NA      |

|                                     |                |                                                                |                                                                   |                            |       |                   |                |
|-------------------------------------|----------------|----------------------------------------------------------------|-------------------------------------------------------------------|----------------------------|-------|-------------------|----------------|
| 7. <i>fast running water</i>        |                | 1                                                              | 0                                                                 | 1                          | 1.000 | NA                | NA             |
| <b>Laboratory Testing</b>           |                |                                                                |                                                                   |                            |       |                   |                |
| HIV                                 |                | 2                                                              | 1                                                                 | 3                          | 0.667 | NA                |                |
| Malaria                             |                | 166                                                            | 128                                                               | 294                        | 0.565 | 0.99 (0.99, 0.99) | <0.0001        |
| <b>Continuous Variables</b>         | <b>Missing</b> | <b>Median (IQR) for participants with an admission outcome</b> | <b>Median (IQR) for participants without an admission outcome</b> | <b>Odds Ratio (95% CI)</b> |       |                   | <b>p-value</b> |
| <b>Patient Information</b>          |                |                                                                |                                                                   |                            |       |                   |                |
| Age (months)                        | 4              | 16.5 (32.9)                                                    | 13.1 (21.8)                                                       | 1.01 (1.00, 1.01)          |       |                   | <0.01          |
| Length of illness (days)            | 0              | 2.5 (2.0)                                                      | 3.0 (2.0)                                                         | 1.00 (0.98, 1.01)          |       |                   | 0.931          |
| <b>Vital Signs</b>                  |                |                                                                |                                                                   |                            |       |                   |                |
| Oxygen saturation                   | 10             | 98.1 (2.9)                                                     | 99.0 (2.1)                                                        | 0.86 (0.83, 0.90)          |       |                   | <0.0001        |
| Transformed oxygen saturation*      | 10             | 0 (0)                                                          | 0 (0)                                                             | 1.06 (1.04, 1.09)          |       |                   | <0.0001        |
| Heart Rate                          | 10             | 149.5 (31.2)                                                   | 138.0 (27.0)                                                      | 1.03 (1.02, 1.03)          |       |                   | <0.0001        |
| Respiratory Rate                    | 6              | 50 (22.0)                                                      | 43.0 (18.0)                                                       | 1.03 (1.02, 1.04)          |       |                   | <0.0001        |
| Temperature                         | 4              | 37.8 (1.9)                                                     | 36.8 (0.7)                                                        | 2.64 (2.32, 3.02)          |       |                   | <0.0001        |
| <b>Anthropometric Information</b>   |                |                                                                |                                                                   |                            |       |                   |                |
| Height (cm)                         | 9              | 77 (22.5)                                                      | 74.0 (21.1)                                                       | 1.01 (1.00, 1.01)          |       |                   | <0.01          |
| Weight (kg)                         | 4              | 9.9 (4.2)                                                      | 9.2 (4.6)                                                         | 1.01 (0.99, 1.03)          |       |                   | 0.47           |
| MUAC (mm)                           | 3              | 140 (24.0)                                                     | 143.0 (23.0)                                                      | 0.99 (0.98, 1.00)          |       |                   | <0.001         |
| <b>Sociodemographic Information</b> |                |                                                                |                                                                   |                            |       |                   |                |
| Maternal Age                        | 2              | 26 (7.0)                                                       | 26 (7.0)                                                          | 1.00 (0.98, 1.02)          |       |                   | 0.903          |

\*Transformed Spo2 computed using physiologically derived altitude adjusted virtual shunt formula:  $70.103 * \log_{10}(101.687 - spo2) - 55.833$ .
